# Supplementary material for: Superior Heavy Metal Ion Adsorption Capacity in Aqueous Solution by High-Density Thiol-Functionalized Reduced Graphene Oxides
Source: MDPI journal article supplement (doi:10.3390/molecules28103998), 2023-05-10
Supplement: s1 [file s1]

## Supporting Information

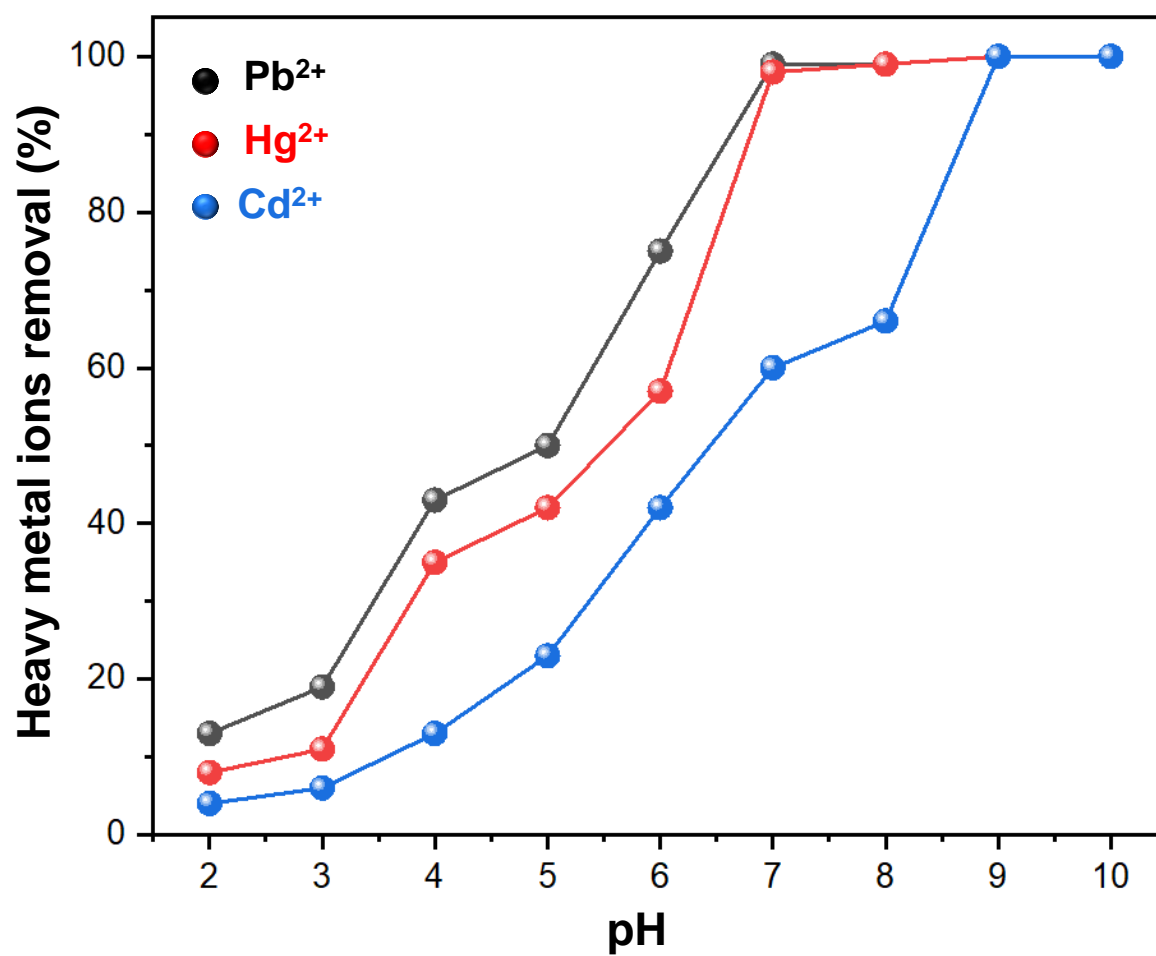

Figure S1. Effect of pH on the percent removal of Pb<sup>2+</sup> by *m*-RGOs.

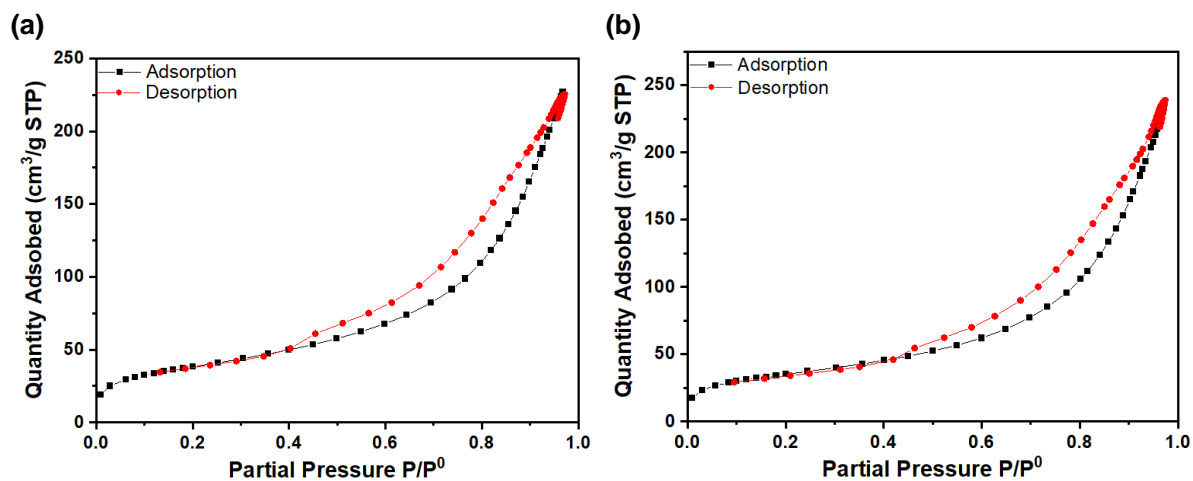

Figure S2. BET N<sub>2</sub> adsorption-desorption isotherms for (a) GOs and (b) *m*-RGOs.

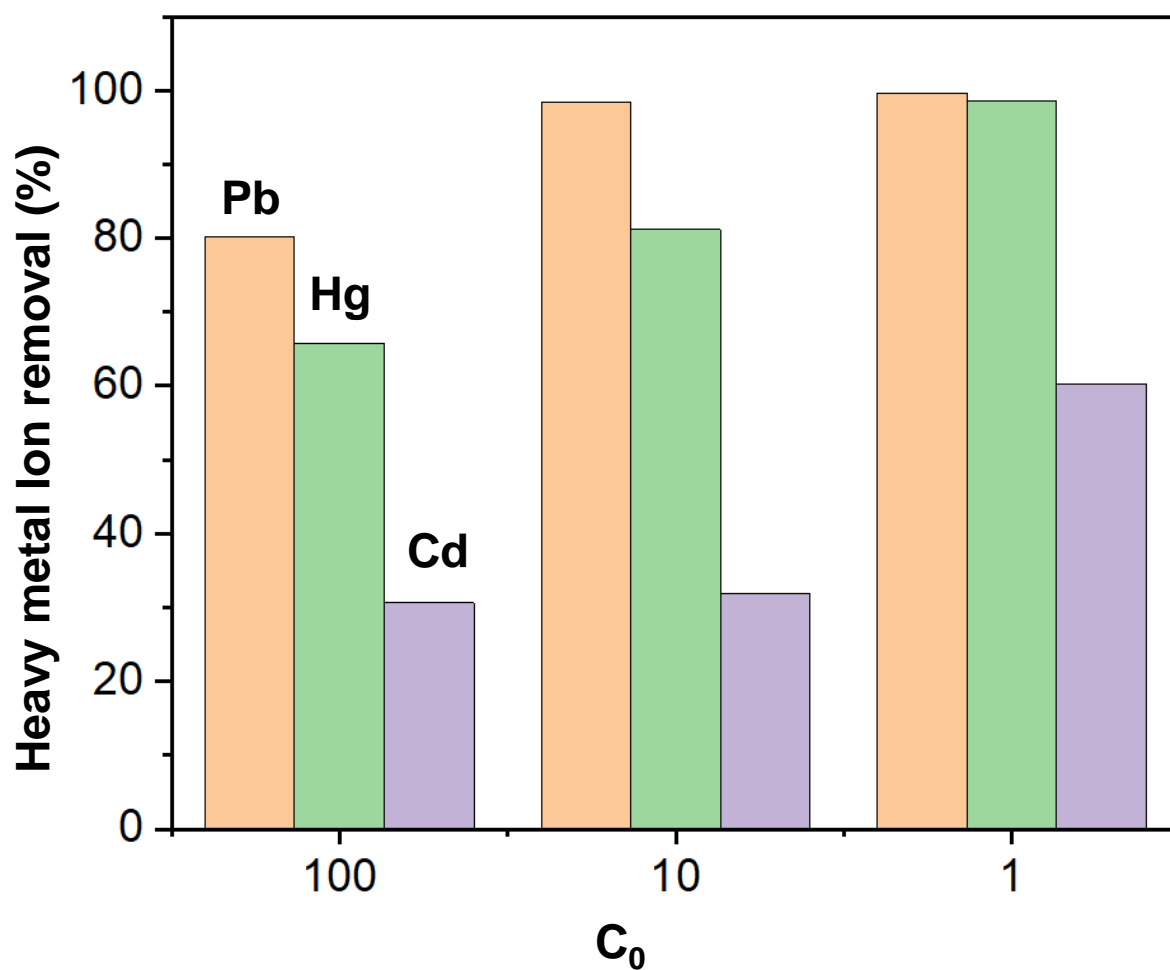

Figure S3. Percent removal of heavy metal ions by *m*-RGOs.
